# Supplementary material
Source: PubMed Central journal article supplement (PMC6917505)

## Supplemental Tables and Figures

**Supplemental Table 1. List of baseline NDM including genomic position, nucleotide change, protein consequence, mutation type and variant allele frequency (VAF).**

| ID  | Gene          | Genomic position | Nucleotide change | Protein consequence | Mutation type  | VAF (%) |
|-----|---------------|------------------|-------------------|---------------------|----------------|---------|
| 35  | <i>TET2</i>   | 4:106157960      | c.2861G>A         | p.Trp954Xaa         | SNV; nonsense  | 52.39   |
| 35  | <i>TET2</i>   | 4:106164860      | c.3729_3733delACT | p.Tyr1245GlyfsTer21 | Frameshift del | 6.18    |
| 35  | <i>TET2</i>   | 4:106193999      | c.4462delA        | p.Asn1489MetfsXaa82 | Frameshift del | 17.74   |
| 54  | <i>TET2</i>   | 4:106155920      | c.822delC         | p.Asn275IlefsXaa18  | Frameshift del | 38.55   |
| 55  | <i>TET2</i>   | 4:106197236      | c.5570_5571delCT  | p.Pro1857ArgfsXaa17 | Frameshift del | 7.06    |
| 106 | <i>TET2</i>   | 4:106155301      | c.202G>T          | p.Gly68Xaa          | SNV; nonsense  | 37      |
| 108 | <i>TET2</i>   | 4:106164939      | c.3803+4A>T       |                     | Frameshift ins | 28.86   |
| 128 | <i>TET2</i>   | 4:106156540      | c.1441C>T         | p.Gln481Xaa         | SNV; nonsense  | 41.35   |
| 131 | <i>TET2</i>   | 4:106180796      | c.3824G>T         | p.Gly1275Val        | SNV; missense  | 33.92   |
| 148 | <i>TET2</i>   | 4:106162586      | c.3500G>A         | p.Arg1167Lys        | SNV; missense  | 28.4    |
| 180 | <i>TET2</i>   | 4:106196446      | c.4781del         | p.Pro1594LeufsXaa2  | Frameshift del | 16.61   |
| 184 | <i>TET2</i>   | 4:106156365      | c.1270del         | p.Ser424AlafsXaa3   | Frameshift del | 5.47    |
| 213 | <i>TET2</i>   | 4:106180829      | c.3857C>T         | p.Ser1286Phe        | SNV; missense  | 34.35   |
| 213 | <i>TET2</i>   | 4:106180854      | c.3882C>G         | p.Tyr1294TXaa       | SNV; nonsense  | 40.71   |
| 215 | <i>TET2</i>   | 4:106156812      | c.1716dup         | p.His573SerfsTer10  | Frameshift ins | 17.79   |
| 35  | <i>SF3B1</i>  | 2:198266834      | c.2098A>G         | p.Lys700Glu         | SNV; missense  | 46.58   |
| 73  | <i>SF3B1</i>  | 2:198267483      | c.1874G>T         | p.Arg625Leu         | SNV; missense  | 28.77   |
| 87  | <i>SF3B1</i>  | 2:198267359      | c.1998G>C         | p.Lys666Asn         | SNV; missense  | 43.62   |
| 103 | <i>SF3B1</i>  | 2:198267359      | c.1998G>C         | p.Lys666Asn         | SNV; missense  | 41.33   |
| 151 | <i>SF3B1</i>  | 2:198267359      | c.1998G>C         | p.Lys666Asn         | SNV; missense  | 40.38   |
| 193 | <i>SF3B1</i>  | 2:198267359      | c.1998G>C         | p.Lys666Asn         | SNV; missense  | 19.56   |
| 123 | <i>SF3B1</i>  | 2:198267360      | c.1997A>G         | p.Lys666Arg         | SNV; missense  | 17.2    |
| 27  | <i>TP53</i>   | 17:7578406       | c.524G>A          | p.Arg175His         | SNV; missense  | 19.8    |
| 38  | <i>TP53</i>   | 17:7577545       | c.736A>G          | p.Met246Val         | SNV; missense  | 38.46   |
| 118 | <i>TP53</i>   | 17:7577578       | c.703A>G          | p.Asn235Asp         | SNV; missense  | 5.09    |
| 118 | <i>TP53</i>   | 17:7577568       | c.713G>A          | p.Cys238Tyr         | SNV; missense  | 13.01   |
| 131 | <i>TP53</i>   | 17:7577556       | c.725G>A          | p.Cys242Tyr         | SNV; missense  | 16.98   |
| 158 | <i>TP53</i>   | 17:7577157       | c.783-2A>C        |                     | Splice site    | 8.79    |
| 180 | <i>TP53</i>   | 17:7578495       | c.433_435del      | p.Leu145del         | Frameshift del | 19.3    |
| 184 | <i>TP53</i>   | 17:7577120       | c.818G>A          | p.Arg273His         | SNV; missense  | 11.06   |
| 25  | <i>ASXL1</i>  | 20:31022442      | c.1934dup         | p.Gly646TrpfsXaa12  | Frameshift ins | 28.64   |
| 115 | <i>ASXL1</i>  | 20:31022442      | c.1934dup         | p.Gly646TrpfsXaa12  | Frameshift ins | 22.7    |
| 125 | <i>ASXL1</i>  | 20:31022442      | c.1934dup         | p.Gly646TrpfsXaa12  | Frameshift ins | 27.72   |
| 130 | <i>ASXL1</i>  | 20:31023408      | c.2893C>T         | p.Arg965Xaa         | SNV; missense  | 9.03    |
| 196 | <i>ASXL1</i>  | 20:31022793      | c.2278C>T         | p.Gln760Xaa         | SNV; nonsense  | 38.79   |
| 61  | <i>DNMT3A</i> | 2:25457242       | c.2645G>A         | p.Arg882His         | SNV; missense  | 15.69   |
| 128 | <i>DNMT3A</i> | 2:25457242       | c.2645G>A         | p.Arg882His         | SNV; missense  | 37.12   |
| 198 | <i>DNMT3A</i> | 2:25457278       | c.2603_2609del    | p.Phe868SerfsXaa11  | Frameshift del | 23.97   |
| 57  | <i>IDH2</i>   | 15:90631934      | c.419G>A          | p.Arg140Gln         | SNV; missense  | 46.03   |
| 193 | <i>IDH2</i>   | 15:90631934      | c.419G>A          | p.Arg140Gln         | SNV; missense  | 19.22   |
| 101 | <i>ZRSR2</i>  | X:15821921       | c.312+2T>A        |                     | Frameshift ins | 10.98   |
| 104 | <i>ZRSR2</i>  | X:15838370       | c.868C>T          | p.Arg290Xaa         | SNV; nonsense  | 92.73   |
| 61  | <i>ETV6</i>   | 12:12006434      | c.403del          | p.His135ThrfsXaa74  | Frameshift del | 16.02   |
| 196 | <i>PHF6</i>   | X:133511706      | c.59_60insT       | p.Lys21Xaa          | Frameshift ins | 74.96   |
| 106 | <i>SRSF2</i>  | 17:74732959      | c.286G>A          | p.Pro95Leu          | SNV; missense  | 35.29   |
| 213 | <i>EZH2</i>   | 7:148514322      | c.1402T>G         | p.Cys468Gly         | SNV; missense  | 20.77   |
| 99  | <i>CSF3R</i>  | 1:36932076       | c.2474G>A         | p.Gly825Glu         | SNV; missense  | 39.63   |

**Supplemental Table 2. Baseline clinical characteristics in patients with and without non-MPN driver mutations (NDM).**

Differences were analyzed using the chi-squared test for categorical variables or fisher's exact test if there was a value less than 5 in any cells of the contingency table and non-parametric Mann-Whitney U test for continuous variables (i.e. age, disease duration, blood counts). MPN=myeloproliferative; patients=patients; n=number; BAT=best available therapy; Hb=hemoglobin; HC=hydroxycarbamide; Hct=hematocrit; NPM=non-MPN (myeloproliferative neoplasm) driver mutation; P32=radioactive phosphorus; Plt: platelet count; RUX=ruxolitinib; y=years; TN=triple negative; WBC=white blood cell count.

| Baseline Clinical Characteristics              |                            | Patients with NDM<br>n (%) | Patients without NDM<br>n (%) | P              |
|------------------------------------------------|----------------------------|----------------------------|-------------------------------|----------------|
| All patients (n=110)                           |                            | 33 (30)                    | 77 (70)                       |                |
| Median age in years (range)                    |                            | 71 (44 – 91)               | 64 (35 – 85)                  | 0.0001         |
| Gender                                         | Female                     | 17 (51.5)                  | 49 (63.6)                     | 0.234          |
|                                                | Male                       | 16 (48.5)                  | 28 (36.4)                     |                |
| HC-Resistant<br>HC-Intolerant                  |                            | 19 (57.6)<br>14 (42.4)     | 34 (44.2)<br>43 (55.8)        | 0.197          |
| Treatment                                      | BAT                        | 17 (51.5)                  | 35 (45.5)                     | 0.560          |
|                                                | RUX                        | 16 (48.5)                  | 42 (54.5)                     |                |
| Disease Duration at TE (y)                     |                            | 6.6 (0.8 – 31)             | 7.7 (0.4 – 25.9)              | 0.699          |
| No. of Prior<br>Therapy<br>Lines               | <3                         | 27 (81.8)                  | 52 (67.5)                     | 0.127          |
|                                                | ≥3                         | 6 (18.2)                   | 25 (32.5)                     |                |
| Interferon<br>Anagrelide                       |                            | 2 (6.1)                    | 16 (20.8)                     | 0.089<br>0.706 |
|                                                |                            | 15 (45.5)                  | 38 (50.6)                     |                |
| Busulfan/P32/Pipobroman                        |                            | 3 (9.1)                    | 9 (11.7)                      | 1.0            |
| Previous Thrombosis<br>Previous Hemorrhage     |                            | 7 (21.2)                   | 28 (36.4)                     | 0.118<br>0.855 |
|                                                |                            | 2 (6.1)                    | 4 (5.2)                       |                |
| Baseline palpable spleen                       |                            | 3 (9.1)                    | 7 (9.1)                       | 1.0            |
| Baseline blood<br>counts<br>(median,<br>range) | WBC (x 10 <sup>9</sup> /l) | 5.8 (1.7 – 15.2)           | 6.1 (2.6 – 29.8)              | 0.917          |
|                                                | Hb (g/l)                   | 115 (90 – 147)             | 125 (87 – 160)                | 0.01           |
|                                                | Hct (%)                    | 36 (28 - 45)               | 38 (27 – 49)                  | 0.207          |
|                                                | Plt (x10 <sup>9</sup> /l)  | 517 (166 – 1406)           | 530 (89 – 1139)               | 0.927          |
| Driver<br>mutation<br>status                   | JAK2V617F                  | 19 (57.6)                  | 36 (46.8)                     | 0.237          |
|                                                | CALR                       | 7 (21.2)                   | 26 (33.8)                     |                |
|                                                | MPL                        | 3 (9.1)                    | 2 (2.6)                       |                |
|                                                | TN                         | 4 (12.1)                   | 13 (16.9)                     |                |
| JAK2V617F allele burden<br>≥50%                |                            | 5/19 (26.3)                | 6/36 (16.7)                   | 0.395          |
| CALR allele burden ≥50%                        |                            | 0/7 (0)                    | 2/26 (7.7)                    | 1.0            |

**Supplemental Table 3. Logistic regression predicting the influence of non-MPN**

**driver mutations (NDM) on clinical outcomes.** All models were adjusted for *JAK2V617F* mutation status and treatment type since patients were stratified by these at trial entry. Further adjusted analysis was performed for outcomes with significant ( $p < 0.05$ ) odd ratios (OR) on initial analysis to include age, TE hemoglobin level and platelet counts denoted indicated with “(adj)” next to OR. The presence of a HMR mutation significantly increased the odds of a transformation event,  $p = 0.015$ . Hemorrhagic events outcomes were associated specifically with the presence of SF mutations. Platelet counts closest to the hemorrhagic event were normal in 3 of these SF-mutated patients and reduced (*ZRSR2*-mutated;  $54 \times 10^9/l$ ) and elevated (*SF3B1*-mutated,  $504 \times 10^9/l$ ) in one patient each. adj=adjusted; AML=acute myeloid leukemia; CHR=complete hematological response; CI=confidence interval; ELN; European LeukemiaNet; HMR=high molecular risk mutation (SF and/or *TP53* mutations); MF=myelofibrosis;  $n_E$  =number of events; non-MPN (myeloproliferative neoplasm) driver mutation; OR=odds ratio; RUX=ruxolitinib; SF= splicing factor mutation (*SF3B1*, *ZRSR2*, *SRSF2*); TE=trial entry; UV=univariate. \*Driver mutation allele burden  $\geq 50\%$  and gender also included in final model for transformation.

| <b>Outcome (<math>n_E</math>)</b>                                                                      | <b>OR (UV)</b>                                | <b>OR 95% CI</b>               | <b>P</b>               |
|--------------------------------------------------------------------------------------------------------|-----------------------------------------------|--------------------------------|------------------------|
| <b>1-year CR (ELN) (<math>n_E=50</math>)</b>                                                           | <b>0.72</b>                                   | <b>0.3 – 1.6</b>               | <b>0.43</b>            |
| <b>1-year post hoc platelet response (<math>n_E =55</math>)</b>                                        | <b>0.5</b>                                    | <b>0.2 – 1.2</b>               | <b>0.12</b>            |
| <b>1-year Overall symptom score response (<math>\geq 50\%</math> reduction) (<math>n_E =12</math>)</b> | <b>0.71</b>                                   | <b>0.2 – 2.6</b>               | <b>0.61</b>            |
| <b>Transformations (MF <math>n_E =13</math>, AML <math>n_E =1</math>)</b>                              | <b>3.8 (NDM) (adj)*<br/>14.4 (HMR) (adj)*</b> | <b>0.7– 21.5<br/>1.7-122.8</b> | <b>0.129<br/>0.015</b> |
| <b>Thrombotic event (<math>n_E =21</math>)</b>                                                         | <b>0.75</b>                                   | <b>0.2 – 2.3</b>               | <b>0.62</b>            |
| <b>Hemorrhagic event (<math>n_E =10</math>)</b>                                                        | <b>2.1 (NDM)(adj)<br/>18.9 (SF)(adj)</b>      | <b>0.5 – 10<br/>2.2 - 161</b>  | <b>0.34<br/>0.007</b>  |
| <b>Death (<math>n_E =13</math>)</b>                                                                    | <b>2.14</b>                                   | <b>0.6– 2.3</b>                | <b>0.21</b>            |
| <b>Stopping RUX treatment (<math>n_E =40</math>)</b>                                                   | <b>0.38 (adj)</b>                             | <b>0.7 – 1.9</b>               | <b>0.25</b>            |

Supplemental Table 4. List of new follow-up NDM including genomic position, nucleotide change, protein consequence, mutation type and variant allele frequency (VAF).

| ID  | Gene          | Genomic position | Nucleotide change | Protein consequence | Mutation type  | VAF (%) |
|-----|---------------|------------------|-------------------|---------------------|----------------|---------|
| 55  | <i>TET2</i>   | 4:106158481      | c.3382dup         | p.Tyr1128LeufsXaa2  | Frameshift ins | 16.68   |
| 55  | <i>TET2</i>   | 4:106162529      | c.3443A>G         | p.Tyr1148Cys        | SNV; missense  | 17.29   |
| 56  | <i>TET2</i>   | 4:106157914      | c.2815C>T         | p.Gln939Xaa         | SNV; nonsense  | 7.63    |
| 118 | <i>TET2</i>   | 4:106190831      | c.4109G>A         | p.Gly1370Glu        | SNV; missense  | 6.15    |
| 180 | <i>TET2</i>   | 4:106155238      | c.141_150del      | p.Val48ThrfsXaa16   | Frameshift del | 6.79    |
| 203 | <i>TET2</i>   | 4:106164080      | c.3590A>G         | p.Lys1197Arg        | SNV; missense  | 5.97    |
| 55  | <i>ASXL1</i>  | 20:31023440      | c.2925T>A         | p.Cys975Xaa         | SNV; nonsense  | 13.61   |
| 55  | <i>ASXL1</i>  | 20:31022442      | c.1934dup         | p.Gly646TrpfsXaa12  | Frameshift ins | 17.73   |
| 67  | <i>ASXL1</i>  | 20:31022442      | c.1934dup         | p.Gly646TrpfsXaa12  | Frameshift ins | 9.75    |
| 76  | <i>ASXL1</i>  | 20:31022903      | c.2388G>A         | p.Trp796Xaa         | SNV; nonsense  | 23.25   |
| 89  | <i>TP53</i>   | 17:7578206       | c.643A>G          | p.Ser215Gly         | SNV; missense  | 14.5    |
| 128 | <i>TP53</i>   | 17:7577568       | c.713G>A          | p.Cys238Tyr         | SNV; missense  | 6.67    |
| 128 | <i>TP53</i>   | 17:7579515       | c.169_172del      | p.Asp57GlnfsXaa65   | Frameshift del | 7.43    |
| 81  | <i>SF3B1</i>  | 2:198267359      | c.1998G>C         | p.Lys666Asn         | SNV; missense  | 5.77    |
| 118 | <i>SF3B1</i>  | 2:198267359      | c.1998G>C         | p.Lys666Asn         | SNV; missense  | 5.44    |
| 114 | <i>SETBP1</i> | 18:42531907      | c.2602G>A         | p.Asp868Asn         | SNV; missense  | 36.44   |
| 128 | <i>U2AF1</i>  | 21:44524456      | c.101C>T          | p.Ser34Phe          | SNV; missense  | 8.5     |

**Supplemental Figure 1. Longitudinal mutational analyses** (A) Waterfall plot of driver mutation change in VAF for each patient at 12months; median change 15.3% (0-400%) and (B) driver mutation change in VAF from 12m to latest time point; median 21.6% (0-389%). (C) BAT-treated patient achieving a JAK2 V617F CMR at 12 months; VAF 22 to 0%. Subsequently, they had a loss of CMR at 44 months with JAK2 V617F VAF 4% coinciding emergence of low level TET2 mutation. (D) RUX-treated patient achieving a CALR PMR at 12 months; VAF 65 to 9%. Subsequently, they had a loss of PMR with a CALR VAF 44% at 60 months and antecedent to this, an ASXL1 mutation emerged at 56 months. Notably, this patient switched from RUX at 20 months due to toxicity. BAT=best available therapy; CMR=complete molecular response; VAF=variant allele frequency; RUX=ruxolitinib; PMR=partial molecular response; TE=trial entry; n=number.

**Supplemental Figure 1.**

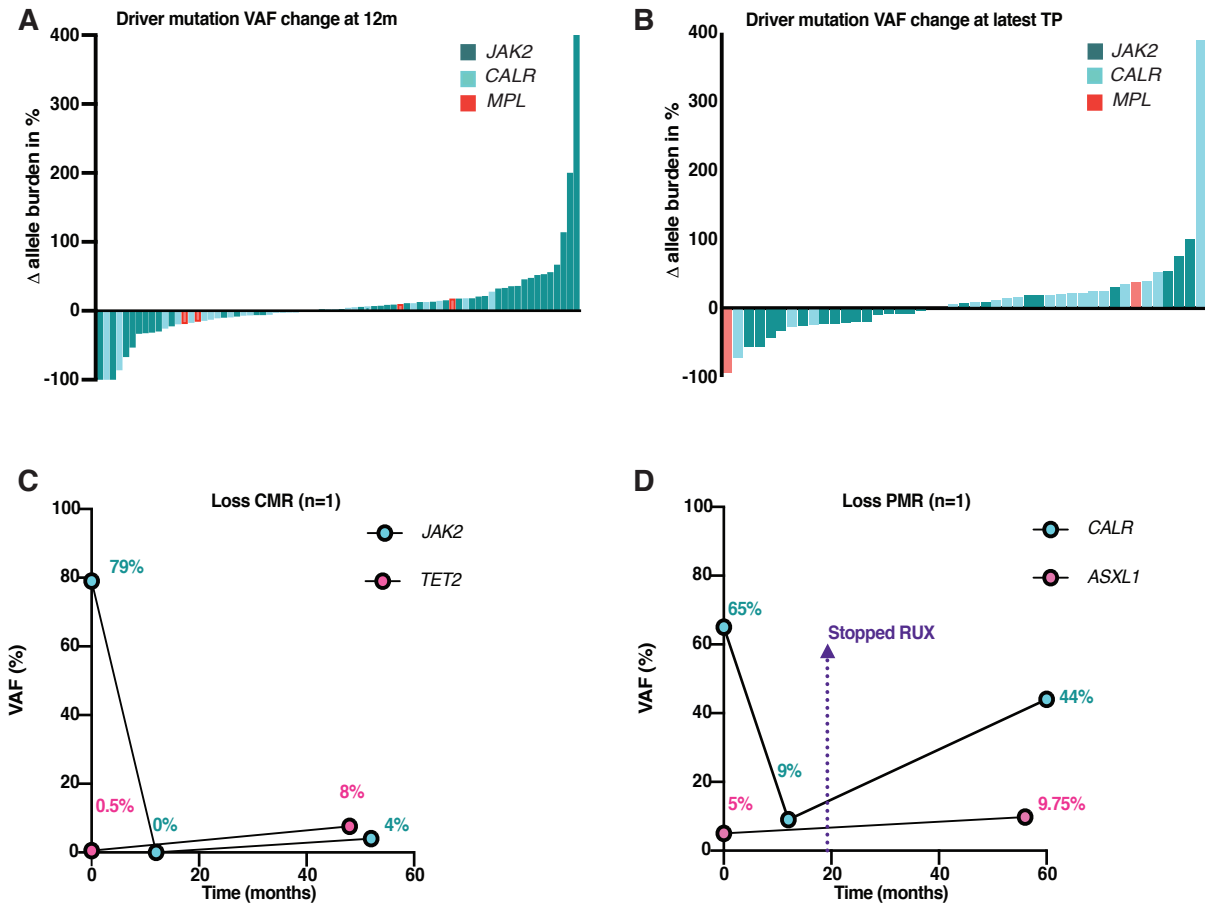

Supplement: EMS85200-supplement-Supplementary_information.pdf [file EMS85200-supplement-Supplementary_information.pdf]
